# Supplementary material for: Analyzing Mass Spectrometry Imaging Data of 13C-Labeled Phospholipids in Camelina sativa and Thlaspi arvense (Pennycress) Embryos
Source: Metabolites. 2021 Mar 4;11(3):148. doi: 10.3390/metabo11030148 (PMC7999836; doi:10.3390/metabo11030148)
Supplement: Supplementary file 1 [file metabolites-11-00148-s001.zip]

Archive with 6 entries (4 files):
- metabolites-1128787-SP-revision/
- metabolites-1128787-SP-revision/supplementary_materials/
- metabolites-1128787-SP-revision/supplementary_materials/13C-MSI_Methods_Metabolites_supplementary_figures.pdf
- metabolites-1128787-SP-revision/supplementary_materials/Supplementary Table S2_Calculations for FA labeling.xlsx
- metabolites-1128787-SP-revision/supplementary_materials/Supplementary_File_S1_mv_script.txt
- metabolites-1128787-SP-revision/supplementary_materials/Supplementary_Table_S1_mz_PC_H_library.xls
