# Supplementary material for: Analyzing Mass Spectrometry Imaging Data of 13C-Labeled Phospholipids in Camelina sativa and Thlaspi arvense (Pennycress) Embryos
Source: Metabolites. 2021 Mar 4;11(3):148. doi: 10.3390/metabo11030148 (PMC7999836; doi:10.3390/metabo11030148)
Supplement: Supplementary file 1 [file metabolites-11-00148-s001.zip › metabolites-1128787-SP-revision/supplementary_materials/Supplementary Table S2_Calculations for FA labeling.xlsx]

## Sheet: Sheet1
	Supplementary Table S2: Calculations for isotopologue distribution and average labeling of fatty acid pairs in PC(38:4) using MS2
	Raw_Intensities					Natural abundance corrected MIDs					Mass isotopologue weighted by the number of labeled carbons					Average Labeling
Time_Tissue	0_Cotyledon	0_EmbryoAxis	64_Cotyledon	64_EmbryoAxis		0_Cotyledon	0_EmbryoAxis	64_Cotyledon	64_EmbryoAxis		0_Cotyledon	0_EmbryoAxis	64_Cotyledon	64_EmbryoAxis		0_Cotyledon	0_EmbryoAxis	64_Cotyledon	64_EmbryoAxis
PC(18:2/20:2)
FA(18:2)_M0	13161882	3.73494e+06	5.87894e+06	2.20846e+06		0.990144	0.992604	0.438729	0.57903		0	0	0	0		0.0547545	0.041087	10.371	6.54481
FA(18:2)_M1	2704674	758196	1.90155e+06	783313		0.0098558	0.00739567	0.05589	0.0916555		0.0098558	0.00739567	0.05589	0.0916555
FA(18:2)_M2	208791	56734.4	2.04171e+06	548806		0	0	0.131272	0.114012		0	0	0.262544	0.228024
FA(18:2)_M3	0	0	2.1142e+06	429292		0	0	0.128984	0.0874554		0	0	0.386951	0.262366
FA(18:2)_M4	0	0	1.92491e+06	323355		0	0	0.115027	0.0655045		0	0	0.460109	0.262018
FA(18:2)_M5	0	0	1.38722e+06	205151		0	0	0.0792969	0.0400559		0	0	0.396485	0.200279
FA(18:2)_M6	0	0	915690	118067		0	0	0.0508013	0.022287		0	0	0.304808	0.133722
FA(20:2)_M0	5070009	1.42809e+06	2.20147e+06	872151		0.996956	0.994754	0.648935	0.594607		0	0	0	0		0.0152202	0.0262299	2.76203	5.39209
FA(20:2)_M1	1.13692e+06	319127	986522	332493		0.00304404	0.00524598	0.149725	0.0970125		0.00304404	0.00524598	0.149725	0.0970125
FA(20:2)_M2	0	21181.7	881549	205872		0	0	0.20134	0.104713		0	0	0.40268	0.209426
FA(20:2)_M3	0	0	0	165831		0	0	0	0.0865639		0	0	0	0.259692
FA(20:2)_M4	0	0	0	139107		0	0	0	0.0732287		0	0	0	0.292915
FA(20:2)_M5	0	0	0	91646.3		0	0	0	0.0438747		0	0	0	0.219373
FA(20:2)_M6	0	0	0	0		0	0	0	0		0	0	0	0
PC(18:3/20:1)
FA(18:3)_M0	7179708	1.74423e+06	6319975	1.40514e+06		0.99203	0.992342	0.601825	0.899919		0	0	0	0		0.0442799	0.0425458	7.10608	1.28153
FA(18:3)_M1	1.48233e+06	359535	2.19973e+06	370693		0.00797038	0.00765825	0.0862772	0.0565494		0.00797038	0.00765825	0.0862772	0.0565494
FA(18:3)_M2	0	0	0	0		0	0	0	0		0	0	0	0
FA(18:3)_M3	0	0	1.46036e+06	0		0	0	0.132588	0		0	0	0.397764	0
FA(18:3)_M4	0	0	1.34671e+06	72769.1		0	0	0.101497	0.0435314		0	0	0.405987	0.174126
FA(18:3)_M5	0	0	1.06825e+06	0		0	0	0.0778134	0		0	0	0.389067	0
FA(20:1)_M0	3353867	708099	1.66143e+06	394134		1	0.994216	0.362619	0.619633		0	0	0	0		0	0.0289198	8.08071	3.76844
FA(20:1)_M1	715112	158171	958742	163112		0	0.00578395	0.129414	0.121059		0	0.00578395	0.129414	0.121059
FA(20:1)_M2	57476.4	12738.2	1030413	118903		0	0	0.185879	0.145296		0	0	0.371758	0.290592
FA(20:1)_M3	0	0	1.00205e+06	98294.6		0	0	0.173382	0.114012		0	0	0.520147	0.342037
FA(20:1)_M4	0	0	902436	0		0	0	0.148706	0		0	0	0.594822	0
FA(20:1)_M5	0	0	0	0		0	0	0	0		0	0	0	0
