# Supplementary material for: Analyzing Mass Spectrometry Imaging Data of 13C-Labeled Phospholipids in Camelina sativa and Thlaspi arvense (Pennycress) Embryos
Source: Metabolites. 2021 Mar 4;11(3):148. doi: 10.3390/metabo11030148 (PMC7999836; doi:10.3390/metabo11030148)
Supplement: Supplementary file 1 [file metabolites-11-00148-s001.zip › metabolites-1128787-SP-revision/supplementary_materials/Supplementary_File_S1_mv_script.txt]

#replace <PATH TO YOUR DIRECTORY> to the directory where sorted images will be sent and then execute the following script/commands within the directory where bulk images have been collected

#use below to create directories for each molecular species in directory where isotopologue images will be sorted (i.e. <PATH TO  YOUR DIRECTORY>)
mkdir PC-34-6 PC-34-5 PC-34-4 PC-34-3 PC-34-2 PC-34-1 PC-34-0 PC-36-6 PC-36-5 PC-36-4 PC-36-3 PC-36-2 PC-36-1 PC-36-0 PC-38-6 PC-38-5 PC-38-4 PC-38-3 PC-38-2 PC-38-1 PC-38-0 PC-40-6 PC-40-5 PC-40-4 PC-40-3 PC-40-2 PC-40-1 PC-40-0

#execute mv commands below in directory containing bulk collected images
mv 750_50738.png 751_51074.png 752_51409.png 753_51745.png 754_52080.png 755_52416.png 756_52751.png 757_53087.png 758_53422.png 759_53758.png 760_54093.png 761_54429.png 762_54764.png 763_55100.png 764_55435.png 765_55771.png 766_56106.png 767_56442.png 768_56777.png 769_57113.png 770_57448.png 771_57784.png 772_58119.png 773_58455.png 774_58790.png 775_59126.png 776_59461.png 777_59797.png 778_60132.png 779_60468.png 780_60803.png 781_61139.png 782_61474.png 783_61810.png 784_62145.png 785_62481.png 786_62816.png 787_63152.png 788_63487.png 789_63823.png 790_64158.png 791_64494.png 792_64829.png -t <PATH TO YOUR DIRECTORY>/PC-34-6

mv 752_52303.png 753_52639.png 754_52974.png 755_53310.png 756_53645.png 757_53981.png 758_54316.png 759_54652.png 760_54987.png 761_55323.png 762_55658.png 763_55994.png 764_56329.png 765_56665.png 766_57000.png 767_57336.png 768_57671.png 769_58007.png 770_58342.png 771_58678.png 772_59013.png 773_59349.png 774_59684.png 775_60020.png 776_60355.png 777_60691.png 778_61026.png 779_61362.png 780_61697.png 781_62033.png 782_62368.png 783_62704.png 784_63039.png 785_63375.png 786_63710.png 787_64046.png 788_64381.png 789_64717.png 790_65052.png 791_65388.png 792_65723.png 793_66059.png 794_66394.png -t <PATH TO YOUR DIRECTORY>/PC-34-5

mv 754_53868.png 755_54204.png 756_54539.png 757_54875.png 758_55210.png 759_55546.png 760_55881.png 761_56217.png 762_56552.png 763_56888.png 764_57223.png 765_57559.png 766_57894.png 767_58230.png 768_58565.png 769_58901.png 770_59236.png 771_59572.png 772_59907.png 773_60243.png 774_60578.png 775_60914.png 776_61249.png 777_61585.png 778_61920.png 779_62256.png 780_62591.png 781_62927.png 782_63262.png 783_63598.png 784_63933.png 785_64269.png 786_64604.png 787_64940.png 788_65275.png 789_65611.png 790_65946.png 791_66282.png 792_66617.png 793_66953.png 794_67288.png 795_67624.png 796_67959.png -t <PATH TO YOUR DIRECTORY>/PC-34-4

mv 756_55433.png 757_55769.png 758_56104.png 759_56440.png 760_56775.png 761_57111.png 762_57446.png 763_57782.png 764_58117.png 765_58453.png 766_58788.png 767_59124.png 768_59459.png 769_59795.png 770_60130.png 771_60466.png 772_60801.png 773_61137.png 774_61472.png 775_61808.png 776_62143.png 777_62479.png 778_62814.png 779_63150.png 780_63485.png 781_63821.png 782_64156.png 783_64492.png 784_64827.png 785_65163.png 786_65498.png 787_65834.png 788_66169.png 789_66505.png 790_66840.png 791_67176.png 792_67511.png 793_67847.png 794_68182.png 795_68518.png 796_68853.png 797_69189.png 798_69524.png -t <PATH TO YOUR DIRECTORY>/PC-34-3

mv 758_56998.png 759_57334.png 760_57669.png 761_58005.png 762_58340.png 763_58676.png 764_59011.png 765_59347.png 766_59682.png 767_60018.png 768_60353.png 769_60689.png 770_61024.png 771_61360.png 772_61695.png 773_62031.png 774_62366.png 775_62702.png 776_63037.png 777_63373.png 778_63708.png 779_64044.png 780_64379.png 781_64715.png 782_65050.png 783_65386.png 784_65721.png 785_66057.png 786_66392.png 787_66728.png 788_67063.png 789_67399.png 790_67734.png 791_68070.png 792_68405.png 793_68741.png 794_69076.png 795_69412.png 796_69747.png 797_70083.png 798_70418.png 799_70754.png 800_71089.png -t <PATH TO YOUR DIRECTORY>/PC-34-2

mv 760_58563.png 761_58899.png 762_59234.png 763_59570.png 764_59905.png 765_60241.png 766_60576.png 767_60912.png 768_61247.png 769_61583.png 770_61918.png 771_62254.png 772_62589.png 773_62925.png 774_63260.png 775_63596.png 776_63931.png 777_64267.png 778_64602.png 779_64938.png 780_65273.png 781_65609.png 782_65944.png 783_66280.png 784_66615.png 785_66951.png 786_67286.png 787_67622.png 788_67957.png 789_68293.png 790_68628.png 791_68964.png 792_69299.png 793_69635.png 794_69970.png 795_70306.png 796_70641.png 797_70977.png 798_71312.png 799_71648.png 800_71983.png 801_72319.png 802_72654.png -t <PATH TO YOUR DIRECTORY>/PC-34-1

mv 762_60128.png 763_60464.png 764_60799.png 765_61135.png 766_61470.png 767_61806.png 768_62141.png 769_62477.png 770_62812.png 771_63148.png 772_63483.png 773_63819.png 774_64154.png 775_64490.png 776_64825.png 777_65161.png 778_65496.png 779_65832.png 780_66167.png 781_66503.png 782_66838.png 783_67174.png 784_67509.png 785_67845.png 786_68180.png 787_68516.png 788_68851.png 789_69187.png 790_69522.png 791_69858.png 792_70193.png 793_70529.png 794_70864.png 795_71200.png 796_71535.png 797_71871.png 798_72206.png 799_72542.png 800_72877.png 801_73213.png 802_73548.png 803_73884.png 804_74219.png -t <PATH TO YOUR DIRECTORY>/PC-34-0

mv 778_53868.png 779_54204.png 780_54539.png 781_54875.png 782_55210.png 783_55546.png 784_55881.png 785_56217.png 786_56552.png 787_56888.png 788_57223.png 789_57559.png 790_57894.png 791_58230.png 792_58565.png 793_58901.png 794_59236.png 795_59572.png 796_59907.png 797_60243.png 798_60578.png 799_60914.png 800_61249.png 801_61585.png 802_61920.png 803_62256.png 804_62591.png 805_62927.png 806_63262.png 807_63598.png 808_63933.png 809_64269.png 810_64604.png 811_64940.png 812_65275.png 813_65611.png 814_65946.png 815_66282.png 816_66617.png 817_66953.png 818_67288.png 819_67624.png 820_67959.png 821_68295.png 822_68630.png -t <PATH TO YOUR DIRECTORY>/PC-36-6

mv 780_55433.png 781_55769.png 782_56104.png 783_56440.png 784_56775.png 785_57111.png 786_57446.png 787_57782.png 788_58117.png 789_58453.png 790_58788.png 791_59124.png 792_59459.png 793_59795.png 794_60130.png 795_60466.png 796_60801.png 797_61137.png 798_61472.png 799_61808.png 800_62143.png 801_62479.png 802_62814.png 803_63150.png 804_63485.png 805_63821.png 806_64156.png 807_64492.png 808_64827.png 809_65163.png 810_65498.png 811_65834.png 812_66169.png 813_66505.png 814_66840.png 815_67176.png 816_67511.png 817_67847.png 818_68182.png 819_68518.png 820_68853.png 821_69189.png 822_69524.png 823_69860.png 824_70195.png -t <PATH TO YOUR DIRECTORY>/PC-36-5

mv 782_56998.png 783_57334.png 784_57669.png 785_58005.png 786_58340.png 787_58676.png 788_59011.png 789_59347.png 790_59682.png 791_60018.png 792_60353.png 793_60689.png 794_61024.png 795_61360.png 796_61695.png 797_62031.png 798_62366.png 799_62702.png 800_63037.png 801_63373.png 802_63708.png 803_64044.png 804_64379.png 805_64715.png 806_65050.png 807_65386.png 808_65721.png 809_66057.png 810_66392.png 811_66728.png 812_67063.png 813_67399.png 814_67734.png 815_68070.png 816_68405.png 817_68741.png 818_69076.png 819_69412.png 820_69747.png 821_70083.png 822_70418.png 823_70754.png 824_71089.png 825_71425.png 826_71760.png -t <PATH TO YOUR DIRECTORY>/PC-36-4

mv 784_58563.png 785_58899.png 786_59234.png 787_59570.png 788_59905.png 789_60241.png 790_60576.png 791_60912.png 792_61247.png 793_61583.png 794_61918.png 795_62254.png 796_62589.png 797_62925.png 798_63260.png 799_63596.png 800_63931.png 801_64267.png 802_64602.png 803_64938.png 804_65273.png 805_65609.png 806_65944.png 807_66280.png 808_66615.png 809_66951.png 810_67286.png 811_67622.png 812_67957.png 813_68293.png 814_68628.png 815_68964.png 816_69299.png 817_69635.png 818_69970.png 819_70306.png 820_70641.png 821_70977.png 822_71312.png 823_71648.png 824_71983.png 825_72319.png 826_72654.png 827_72990.png 828_73325.png -t <PATH TO YOUR DIRECTORY>/PC-36-3

mv 786_60128.png 787_60464.png 788_60799.png 789_61135.png 790_61470.png 791_61806.png 792_62141.png 793_62477.png 794_62812.png 795_63148.png 796_63483.png 797_63819.png 798_64154.png 799_64490.png 800_64825.png 801_65161.png 802_65496.png 803_65832.png 804_66167.png 805_66503.png 806_66838.png 807_67174.png 808_67509.png 809_67845.png 810_68180.png 811_68516.png 812_68851.png 813_69187.png 814_69522.png 815_69858.png 816_70193.png 817_70529.png 818_70864.png 819_71200.png 820_71535.png 821_71871.png 822_72206.png 823_72542.png 824_72877.png 825_73213.png 826_73548.png 827_73884.png 828_74219.png 829_74555.png 830_74890.png -t <PATH TO YOUR DIRECTORY>/PC-36-2

mv 788_61693.png 789_62029.png 790_62364.png 791_62700.png 792_63035.png 793_63371.png 794_63706.png 795_64042.png 796_64377.png 797_64713.png 798_65048.png 799_65384.png 800_65719.png 801_66055.png 802_66390.png 803_66726.png 804_67061.png 805_67397.png 806_67732.png 807_68068.png 808_68403.png 809_68739.png 810_69074.png 811_69410.png 812_69745.png 813_70081.png 814_70416.png 815_70752.png 816_71087.png 817_71423.png 818_71758.png 819_72094.png 820_72429.png 821_72765.png 822_73100.png 823_73436.png 824_73771.png 825_74107.png 826_74442.png 827_74778.png 828_75113.png 829_75449.png 830_75784.png 831_76120.png 832_76455.png -t <PATH TO YOUR DIRECTORY>/PC-36-1

mv 790_63258.png 791_63594.png 792_63929.png 793_64265.png 794_64600.png 795_64936.png 796_65271.png 797_65607.png 798_65942.png 799_66278.png 800_66613.png 801_66949.png 802_67284.png 803_67620.png 804_67955.png 805_68291.png 806_68626.png 807_68962.png 808_69297.png 809_69633.png 810_69968.png 811_70304.png 812_70639.png 813_70975.png 814_71310.png 815_71646.png 816_71981.png 817_72317.png 818_72652.png 819_72988.png 820_73323.png 821_73659.png 822_73994.png 823_74330.png 824_74665.png 825_75001.png 826_75336.png 827_75672.png 828_76007.png 829_76343.png 830_76678.png 831_77014.png 832_77349.png 833_77685.png 834_78020.png -t <PATH TO YOUR DIRECTORY>/PC-36-0

mv 806_56998.png 807_57334.png 808_57669.png 809_58005.png 810_58340.png 811_58676.png 812_59011.png 813_59347.png 814_59682.png 815_60018.png 816_60353.png 817_60689.png 818_61024.png 819_61360.png 820_61695.png 821_62031.png 822_62366.png 823_62702.png 824_63037.png 825_63373.png 826_63708.png 827_64044.png 828_64379.png 829_64715.png 830_65050.png 831_65386.png 832_65721.png 833_66057.png 834_66392.png 835_66728.png 836_67063.png 837_67399.png 838_67734.png 839_68070.png 840_68405.png 841_68741.png 842_69076.png 843_69412.png 844_69747.png 845_70083.png 846_70418.png 847_70754.png 848_71089.png 849_71425.png 850_71760.png 851_72096.png 852_72431.png -t <PATH TO YOUR DIRECTORY>/PC-38-6

mv 808_58563.png 809_58899.png 810_59234.png 811_59570.png 812_59905.png 813_60241.png 814_60576.png 815_60912.png 816_61247.png 817_61583.png 818_61918.png 819_62254.png 820_62589.png 821_62925.png 822_63260.png 823_63596.png 824_63931.png 825_64267.png 826_64602.png 827_64938.png 828_65273.png 829_65609.png 830_65944.png 831_66280.png 832_66615.png 833_66951.png 834_67286.png 835_67622.png 836_67957.png 837_68293.png 838_68628.png 839_68964.png 840_69299.png 841_69635.png 842_69970.png 843_70306.png 844_70641.png 845_70977.png 846_71312.png 847_71648.png 848_71983.png 849_72319.png 850_72654.png 851_72990.png 852_73325.png 853_73661.png 854_73996.png -t <PATH TO YOUR DIRECTORY>/PC-38-5

mv 810_60128.png 811_60464.png 812_60799.png 813_61135.png 814_61470.png 815_61806.png 816_62141.png 817_62477.png 818_62812.png 819_63148.png 820_63483.png 821_63819.png 822_64154.png 823_64490.png 824_64825.png 825_65161.png 826_65496.png 827_65832.png 828_66167.png 829_66503.png 830_66838.png 831_67174.png 832_67509.png 833_67845.png 834_68180.png 835_68516.png 836_68851.png 837_69187.png 838_69522.png 839_69858.png 840_70193.png 841_70529.png 842_70864.png 843_71200.png 844_71535.png 845_71871.png 846_72206.png 847_72542.png 848_72877.png 849_73213.png 850_73548.png 851_73884.png 852_74219.png 853_74555.png 854_74890.png 855_75226.png 856_75561.png -t <PATH TO YOUR DIRECTORY>/PC-38-4

mv 812_61693.png 813_62029.png 814_62364.png 815_62700.png 816_63035.png 817_63371.png 818_63706.png 819_64042.png 820_64377.png 821_64713.png 822_65048.png 823_65384.png 824_65719.png 825_66055.png 826_66390.png 827_66726.png 828_67061.png 829_67397.png 830_67732.png 831_68068.png 832_68403.png 833_68739.png 834_69074.png 835_69410.png 836_69745.png 837_70081.png 838_70416.png 839_70752.png 840_71087.png 841_71423.png 842_71758.png 843_72094.png 844_72429.png 845_72765.png 846_73100.png 847_73436.png 848_73771.png 849_74107.png 850_74442.png 851_74778.png 852_75113.png 853_75449.png 854_75784.png 855_76120.png 856_76455.png 857_76791.png 858_77126.png -t <PATH TO YOUR DIRECTORY>/PC-38-3

mv 814_63258.png 815_63594.png 816_63929.png 817_64265.png 818_64600.png 819_64936.png 820_65271.png 821_65607.png 822_65942.png 823_66278.png 824_66613.png 825_66949.png 826_67284.png 827_67620.png 828_67955.png 829_68291.png 830_68626.png 831_68962.png 832_69297.png 833_69633.png 834_69968.png 835_70304.png 836_70639.png 837_70975.png 838_71310.png 839_71646.png 840_71981.png 841_72317.png 842_72652.png 843_72988.png 844_73323.png 845_73659.png 846_73994.png 847_74330.png 848_74665.png 849_75001.png 850_75336.png 851_75672.png 852_76007.png 853_76343.png 854_76678.png 855_77014.png 856_77349.png 857_77685.png 858_78020.png 859_78356.png 860_78691.png -t <PATH TO YOUR DIRECTORY>/PC-38-2

mv 816_64823.png 817_65159.png 818_65494.png 819_65830.png 820_66165.png 821_66501.png 822_66836.png 823_67172.png 824_67507.png 825_67843.png 826_68178.png 827_68514.png 828_68849.png 829_69185.png 830_69520.png 831_69856.png 832_70191.png 833_70527.png 834_70862.png 835_71198.png 836_71533.png 837_71869.png 838_72204.png 839_72540.png 840_72875.png 841_73211.png 842_73546.png 843_73882.png 844_74217.png 845_74553.png 846_74888.png 847_75224.png 848_75559.png 849_75895.png 850_76230.png 851_76566.png 852_76901.png 853_77237.png 854_77572.png 855_77908.png 856_78243.png 857_78579.png 858_78914.png 859_79250.png 860_79585.png 861_79921.png 862_80256.png -t <PATH TO YOUR DIRECTORY>/PC-38-1

mv 818_66388.png 819_66724.png 820_67059.png 821_67395.png 822_67730.png 823_68066.png 824_68401.png 825_68737.png 826_69072.png 827_69408.png 828_69743.png 829_70079.png 830_70414.png 831_70750.png 832_71085.png 833_71421.png 834_71756.png 835_72092.png 836_72427.png 837_72763.png 838_73098.png 839_73434.png 840_73769.png 841_74105.png 842_74440.png 843_74776.png 844_75111.png 845_75447.png 846_75782.png 847_76118.png 848_76453.png 849_76789.png 850_77124.png 851_77460.png 852_77795.png 853_78131.png 854_78466.png 855_78802.png 856_79137.png 857_79473.png 858_79808.png 859_80144.png 860_80479.png 861_80815.png 862_81150.png 863_81486.png 864_81821.png -t <PATH TO YOUR DIRECTORY>/PC-38-0

mv 834_60128.png 835_60464.png 836_60799.png 837_61135.png 838_61470.png 839_61806.png 840_62141.png 841_62477.png 842_62812.png 843_63148.png 844_63483.png 845_63819.png 846_64154.png 847_64490.png 848_64825.png 849_65161.png 850_65496.png 851_65832.png 852_66167.png 853_66503.png 854_66838.png 855_67174.png 856_67509.png 857_67845.png 858_68180.png 859_68516.png 860_68851.png 861_69187.png 862_69522.png 863_69858.png 864_70193.png 865_70529.png 866_70864.png 867_71200.png 868_71535.png 869_71871.png 870_72206.png 871_72542.png 872_72877.png 873_73213.png 874_73548.png 875_73884.png 876_74219.png 877_74555.png 878_74890.png 879_75226.png 880_75561.png 880_75561.png 881_75897.png -t <PATH TO YOUR DIRECTORY>/PC-40-6

mv 836_61693.png 837_62029.png 838_62364.png 839_62700.png 840_63035.png 841_63371.png 842_63706.png 843_64042.png 844_64377.png 845_64713.png 846_65048.png 847_65384.png 848_65719.png 849_66055.png 850_66390.png 851_66726.png 852_67061.png 853_67397.png 854_67732.png 855_68068.png 856_68403.png 857_68739.png 858_69074.png 859_69410.png 860_69745.png 861_70081.png 862_70416.png 863_70752.png 864_71087.png 865_71423.png 866_71758.png 867_72094.png 868_72429.png 869_72765.png 870_73100.png 871_73436.png 872_73771.png 873_74107.png 874_74442.png 875_74778.png 876_75113.png 877_75449.png 878_75784.png 879_76120.png 880_76455.png 881_76791.png 882_77126.png 882_77126.png 883_77462.png  -t <PATH TO YOUR DIRECTORY>/PC-40-5

mv 838_63258.png 839_63594.png 840_63929.png 841_64265.png 842_64600.png 843_64936.png 844_65271.png 845_65607.png 846_65942.png 847_66278.png 848_66613.png 849_66949.png 850_67284.png 851_67620.png 852_67955.png 853_68291.png 854_68626.png 855_68962.png 856_69297.png 857_69633.png 858_69968.png 859_70304.png 860_70639.png 861_70975.png 862_71310.png 863_71646.png 864_71981.png 865_72317.png 866_72652.png 867_72988.png 868_73323.png 869_73659.png 870_73994.png 871_74330.png 872_74665.png 873_75001.png 874_75336.png 875_75672.png 876_76007.png 877_76343.png 878_76678.png 879_77014.png 880_77349.png 881_77685.png 882_78020.png 883_78356.png 884_78691.png 884_78691.png 885_79027.png  -t <PATH TO YOUR DIRECTORY>/PC-40-4

mv 840_64823.png 841_65159.png 842_65494.png 843_65830.png 844_66165.png 845_66501.png 846_66836.png 847_67172.png 848_67507.png 849_67843.png 850_68178.png 851_68514.png 852_68849.png 853_69185.png 854_69520.png 855_69856.png 856_70191.png 857_70527.png 858_70862.png 859_71198.png 860_71533.png 861_71869.png 862_72204.png 863_72540.png 864_72875.png 865_73211.png 866_73546.png 867_73882.png 868_74217.png 869_74553.png 870_74888.png 871_75224.png 872_75559.png 873_75895.png 874_76230.png 875_76566.png 876_76901.png 877_77237.png 878_77572.png 879_77908.png 880_78243.png 881_78579.png 882_78914.png 883_79250.png 884_79585.png 885_79921.png 886_80256.png 886_80256.png 887_80592.png -t <PATH TO YOUR DIRECTORY>/PC-40-3

mv 842_66388.png 843_66724.png 844_67059.png 845_67395.png 846_67730.png 847_68066.png 848_68401.png 849_68737.png 850_69072.png 851_69408.png 852_69743.png 853_70079.png 854_70414.png 855_70750.png 856_71085.png 857_71421.png 858_71756.png 859_72092.png 860_72427.png 861_72763.png 862_73098.png 863_73434.png 864_73769.png 865_74105.png 866_74440.png 867_74776.png 868_75111.png 869_75447.png 870_75782.png 871_76118.png 872_76453.png 873_76789.png 874_77124.png 875_77460.png 876_77795.png 877_78131.png 878_78466.png 879_78802.png 880_79137.png 881_79473.png 882_79808.png 883_80144.png 884_80479.png 885_80815.png 886_81150.png 887_81486.png 888_81821.png 888_81821.png 889_82157.png -t <PATH TO YOUR DIRECTORY>/PC-40-2

mv 844_67953.png 845_68289.png 846_68624.png 847_68960.png 848_69295.png 849_69631.png 850_69966.png 851_70302.png 852_70637.png 853_70973.png 854_71308.png 855_71644.png 856_71979.png 857_72315.png 858_72650.png 859_72986.png 860_73321.png 861_73657.png 862_73992.png 863_74328.png 864_74663.png 865_74999.png 866_75334.png 867_75670.png 868_76005.png 869_76341.png 870_76676.png 871_77012.png 872_77347.png 873_77683.png 874_78018.png 875_78354.png 876_78689.png 877_79025.png 878_79360.png 879_79696.png 880_80031.png 881_80367.png 882_80702.png 883_81038.png 884_81373.png 885_81709.png 886_82044.png 887_82380.png 888_82715.png 889_83051.png 890_83386.png 890_83386.png 891_83722.png -t <PATH TO YOUR DIRECTORY>/PC-40-1

mv 846_69518.png 847_69854.png 848_70189.png 849_70525.png 850_70860.png 851_71196.png 852_71531.png 853_71867.png 854_72202.png 855_72538.png 856_72873.png 857_73209.png 858_73544.png 859_73880.png 860_74215.png 861_74551.png 862_74886.png 863_75222.png 864_75557.png 865_75893.png 866_76228.png 867_76564.png 868_76899.png 869_77235.png 870_77570.png 871_77906.png 872_78241.png 873_78577.png 874_78912.png 875_79248.png 876_79583.png 877_79919.png 878_80254.png 879_80590.png 880_80925.png 881_81261.png 882_81596.png 883_81932.png 884_82267.png 885_82603.png 886_82938.png 887_83274.png 888_83609.png 889_83945.png 890_84280.png 891_84616.png 892_84951.png 892_84951.png 893_85287.png -t <PATH TO YOUR DIRECTORY>/PC-40-0
