# Supplementary material for: Analyzing Mass Spectrometry Imaging Data of 13C-Labeled Phospholipids in Camelina sativa and Thlaspi arvense (Pennycress) Embryos
Source: Metabolites. 2021 Mar 4;11(3):148. doi: 10.3390/metabo11030148 (PMC7999836; doi:10.3390/metabo11030148)
Supplement: Supplementary file 1 [file metabolites-11-00148-s001.zip › metabolites-1128787-SP-revision/supplementary_materials/Supplementary_Table_S1_mz_PC_H_library.xls]

## Sheet: Table S1-PC_H_mz
Supplementary Table S1. m/z values for H+ adducts of PC molecular species
abbev name	PC-34:6	PC-34:5	PC-34:4	PC-34:3	PC-34:2	PC-34:1	PC-34:0	PC-36:6	PC-36:5	PC-36:4	PC-36:3	PC-36:2	PC-36:1	PC-36:0	PC-38:6	PC-38:5	PC-38:4	PC-38:3	PC-38:2	PC-38:1	PC-38:0	PC-40:6	PC-40:5	PC-40:4	PC-40:3	PC-40:2	PC-40:1	PC-40:0
formula	C42H72O8NP	C42H74O8NP	C42H76O8NP	C42H78O8NP	C42H80O8NP	C42H82O8NP	C42H84O8NP	C44H76O8NP	C44H78O8NP	C44H80O8NP	C44H82O8NP	C44H84O8NP	C44H86O8NP	C44H88O8NP	C46H80O8NP	C46H82O8NP	C46H84O8NP	C46H86O8NP	C46H88O8NP	C46H90O8NP	C46H92O8NP	C48H84O8NP	C48H86O8NP	C48H88O8NP	C48H90O8NP	C48H92O8NP	C48H94O8NP	C48H96O8NP
C12	749.5	751.515	753.531	755.547	757.562	759.578	761.593	777.531	779.547	781.562	783.578	785.593	787.609	789.625	805.562	807.578	809.593	811.609	813.625	815.64	817.656	833.593	835.609	837.625	839.64	841.656	843.672	845.687
C12+H	750.507	752.523	754.539	756.554	758.57	760.586	762.601	778.539	780.554	782.57	784.586	786.601	788.617	790.633	806.57	808.586	810.601	812.617	814.633	816.648	818.664	834.601	836.617	838.633	840.648	842.664	844.68	846.695
1-C13+H	751.511	753.526	755.542	757.558	759.573	761.589	763.605	779.542	781.558	783.573	785.589	787.605	789.62	791.636	807.573	809.589	811.605	813.62	815.636	817.652	819.667	835.605	837.62	839.636	841.652	843.667	845.683	847.699
2-C13+H	752.514	754.53	756.545	758.561	760.577	762.592	764.608	780.545	782.561	784.577	786.592	788.608	790.624	792.639	808.577	810.592	812.608	814.624	816.639	818.655	820.671	836.608	838.624	840.639	842.655	844.671	846.686	848.702
3-C13+H	753.517	755.533	757.549	759.564	761.58	763.596	765.611	781.549	783.564	785.58	787.596	789.611	791.627	793.643	809.58	811.596	813.611	815.627	817.643	819.658	821.674	837.611	839.627	841.643	843.658	845.674	847.69	849.705
4-C13+H	754.521	756.536	758.552	760.568	762.583	764.599	766.615	782.552	784.568	786.583	788.599	790.615	792.63	794.646	810.583	812.599	814.615	816.63	818.646	820.662	822.677	838.615	840.63	842.646	844.662	846.677	848.693	850.709
5-C13+H	755.524	757.54	759.555	761.571	763.587	765.602	767.618	783.555	785.571	787.587	789.602	791.618	793.634	795.649	811.587	813.602	815.618	817.634	819.649	821.665	823.681	839.618	841.634	843.649	845.665	847.681	849.696	851.712
6-C13+H	756.528	758.543	760.559	762.574	764.59	766.606	768.621	784.559	786.574	788.59	790.606	792.621	794.637	796.653	812.59	814.606	816.621	818.637	820.653	822.668	824.684	840.621	842.637	844.653	846.668	848.684	850.7	852.715
7-C13+H	757.531	759.547	761.562	763.578	765.593	767.609	769.625	785.562	787.578	789.593	791.609	793.625	795.64	797.656	813.593	815.609	817.625	819.64	821.656	823.672	825.687	841.625	843.64	845.656	847.672	849.687	851.703	853.719
8-C13+H	758.534	760.55	762.566	764.581	766.597	768.612	770.628	786.566	788.581	790.597	792.612	794.628	796.644	798.659	814.597	816.612	818.628	820.644	822.659	824.675	826.691	842.628	844.644	846.659	848.675	850.691	852.706	854.722
9-C13+H	759.538	761.553	763.569	765.585	767.6	769.616	771.631	787.569	789.585	791.6	793.616	795.631	797.647	799.663	815.6	817.616	819.631	821.647	823.663	825.678	827.694	843.631	845.647	847.663	849.678	851.694	853.71	855.725
10-C13+H	760.541	762.557	764.572	766.588	768.604	770.619	772.635	788.572	790.588	792.604	794.619	796.635	798.65	800.666	816.604	818.619	820.635	822.65	824.666	826.682	828.697	844.635	846.65	848.666	850.682	852.697	854.713	856.729
11-C13+H	761.544	763.56	765.576	767.591	769.607	771.623	773.638	789.576	791.591	793.607	795.623	797.638	799.654	801.669	817.607	819.623	821.638	823.654	825.669	827.685	829.701	845.638	847.654	849.669	851.685	853.701	855.716	857.732
12-C13+H	762.548	764.563	766.579	768.595	770.61	772.626	774.642	790.579	792.595	794.61	796.626	798.642	800.657	802.673	818.61	820.626	822.642	824.657	826.673	828.688	830.704	846.642	848.657	850.673	852.688	854.704	856.72	858.735
13-C13+H	763.551	765.567	767.582	769.598	771.614	773.629	775.645	791.582	793.598	795.614	797.629	799.645	801.661	803.676	819.614	821.629	823.645	825.661	827.676	829.692	831.707	847.645	849.661	851.676	853.692	855.707	857.723	859.739
14-C13+H	764.554	766.57	768.586	770.601	772.617	774.633	776.648	792.586	794.601	796.617	798.633	800.648	802.664	804.68	820.617	822.633	824.648	826.664	828.68	830.695	832.711	848.648	850.664	852.68	854.695	856.711	858.727	860.742
15-C13+H	765.558	767.573	769.589	771.605	773.62	775.636	777.652	793.589	795.605	797.62	799.636	801.652	803.667	805.683	821.62	823.636	825.652	827.667	829.683	831.699	833.714	849.652	851.667	853.683	855.699	857.714	859.73	861.746
16-C13+H	766.561	768.577	770.592	772.608	774.624	776.639	778.655	794.592	796.608	798.624	800.639	802.655	804.671	806.686	822.624	824.639	826.655	828.671	830.686	832.702	834.718	850.655	852.671	854.686	856.702	858.718	860.733	862.749
17-C13+H	767.564	769.58	771.596	773.611	775.627	777.643	779.658	795.596	797.611	799.627	801.643	803.658	805.674	807.69	823.627	825.643	827.658	829.674	831.69	833.705	835.721	851.658	853.674	855.69	857.705	859.721	861.737	863.752
18-C13+H	768.568	770.583	772.599	774.615	776.63	778.646	780.662	796.599	798.615	800.63	802.646	804.662	806.677	808.693	824.63	826.646	828.662	830.677	832.693	834.709	836.724	852.662	854.677	856.693	858.709	860.724	862.74	864.756
19-C13+H	769.571	771.587	773.602	775.618	777.634	779.649	781.665	797.602	799.618	801.634	803.649	805.665	807.681	809.696	825.634	827.649	829.665	831.681	833.696	835.712	837.728	853.665	855.681	857.696	859.712	861.728	863.743	865.759
20-C13+H	770.574	772.59	774.606	776.621	778.637	780.653	782.668	798.606	800.621	802.637	804.653	806.668	808.684	810.7	826.637	828.653	830.668	832.684	834.7	836.715	838.731	854.668	856.684	858.7	860.715	862.731	864.747	866.762
21-C13+H	771.578	773.593	775.609	777.625	779.64	781.656	783.672	799.609	801.625	803.64	805.656	807.672	809.687	811.703	827.64	829.656	831.672	833.687	835.703	837.719	839.734	855.672	857.687	859.703	861.719	863.734	865.75	867.766
22-C13+H	772.581	774.597	776.612	778.628	780.644	782.659	784.675	800.612	802.628	804.644	806.659	808.675	810.691	812.706	828.644	830.659	832.675	834.691	836.706	838.722	840.738	856.675	858.691	860.706	862.722	864.738	866.753	868.769
23-C13+H	773.585	775.6	777.616	779.631	781.647	783.663	785.678	801.616	803.631	805.647	807.663	809.678	811.694	813.71	829.647	831.663	833.678	835.694	837.71	839.725	841.741	857.678	859.694	861.71	863.725	865.741	867.757	869.772
24-C13+H	774.588	776.604	778.619	780.635	782.651	784.666	786.682	802.619	804.635	806.651	808.666	810.682	812.697	814.713	830.651	832.666	834.682	836.697	838.713	840.729	842.744	858.682	860.697	862.713	864.729	866.744	868.76	870.776
25-C13+H	775.591	777.607	779.623	781.638	783.654	785.67	787.685	803.623	805.638	807.654	809.67	811.685	813.701	815.716	831.654	833.67	835.685	837.701	839.716	841.732	843.748	859.685	861.701	863.716	865.732	867.748	869.763	871.779
26-C13+H	776.595	778.61	780.626	782.642	784.657	786.673	788.689	804.626	806.642	808.657	810.673	812.689	814.704	816.72	832.657	834.673	836.689	838.704	840.72	842.735	844.751	860.689	862.704	864.72	866.735	868.751	870.767	872.782
27-C13+H	777.598	779.614	781.629	783.645	785.661	787.676	789.692	805.629	807.645	809.661	811.676	813.692	815.708	817.723	833.661	835.676	837.692	839.708	841.723	843.739	845.754	861.692	863.708	865.723	867.739	869.754	871.77	873.786
28-C13+H	778.601	780.617	782.633	784.648	786.664	788.68	790.695	806.633	808.648	810.664	812.68	814.695	816.711	818.727	834.664	836.68	838.695	840.711	842.727	844.742	846.758	862.695	864.711	866.727	868.742	870.758	872.773	874.789
29-C13+H	779.605	781.62	783.636	785.652	787.667	789.683	791.699	807.636	809.652	811.667	813.683	815.699	817.714	819.73	835.667	837.683	839.699	841.714	843.73	845.746	847.761	863.699	865.714	867.73	869.746	871.761	873.777	875.792
30-C13+H	780.608	782.624	784.639	786.655	788.671	790.686	792.702	808.639	810.655	812.671	814.686	816.702	818.718	820.733	836.671	838.686	840.702	842.718	844.733	846.749	848.765	864.702	866.718	868.733	870.749	872.765	874.78	876.796
31-C13+H	781.611	783.627	785.643	787.658	789.674	791.69	793.705	809.643	811.658	813.674	815.69	817.705	819.721	821.737	837.674	839.69	841.705	843.721	845.737	847.752	849.768	865.705	867.721	869.737	871.752	873.768	875.784	877.799
32-C13+H	782.615	784.63	786.646	788.662	790.677	792.693	794.709	810.646	812.662	814.677	816.693	818.709	820.724	822.74	838.677	840.693	842.709	844.724	846.74	848.756	850.771	866.709	868.724	870.74	872.756	874.771	876.787	878.803
33-C13+H	783.618	785.634	787.649	789.665	791.681	793.696	795.712	811.649	813.665	815.681	817.696	819.712	821.728	823.743	839.681	841.696	843.712	845.728	847.743	849.759	851.775	867.712	869.728	871.743	873.759	875.775	877.79	879.806
34-C13+H	784.621	786.637	788.653	790.668	792.684	794.7	796.715	812.653	814.668	816.684	818.7	820.715	822.731	824.747	840.684	842.7	844.715	846.731	848.747	850.762	852.778	868.715	870.731	872.747	874.762	876.778	878.794	880.809
35-C13+H	785.625	787.64	789.656	791.672	793.687	795.703	797.719	813.656	815.672	817.687	819.703	821.719	823.734	825.75	841.687	843.703	845.719	847.734	849.75	851.766	853.781	869.719	871.734	873.75	875.766	877.781	879.797	881.813
36-C13+H	786.628	788.644	790.659	792.675	794.691	796.706	798.722	814.659	816.675	818.691	820.706	822.722	824.738	826.753	842.691	844.706	846.722	848.738	850.753	852.769	854.785	870.722	872.738	874.753	876.769	878.785	880.8	882.816
37-C13+H	787.632	789.647	791.663	793.678	795.694	797.71	799.725	815.663	817.678	819.694	821.71	823.725	825.741	827.757	843.694	845.71	847.725	849.741	851.757	853.772	855.788	871.725	873.741	875.757	877.772	879.788	881.804	883.819
38-C13+H	788.635	790.651	792.666	794.682	796.697	798.713	800.729	816.666	818.682	820.697	822.713	824.729	826.744	828.76	844.697	846.713	848.729	850.744	852.76	854.776	856.791	872.729	874.744	876.76	878.776	880.791	882.807	884.823
39-C13+H	789.638	791.654	793.67	795.685	797.701	799.716	801.732	817.67	819.685	821.701	823.716	825.732	827.748	829.763	845.701	847.716	849.732	851.748	853.763	855.779	857.795	873.732	875.748	877.763	879.779	881.795	883.81	885.826
40-C13+H	790.642	792.657	794.673	796.689	798.704	800.72	802.735	818.673	820.689	822.704	824.72	826.735	828.751	830.767	846.704	848.72	850.735	852.751	854.767	856.782	858.798	874.735	876.751	878.767	880.782	882.798	884.814	886.829
41-C13+H	791.645	793.661	795.676	797.692	799.708	801.723	803.739	819.676	821.692	823.708	825.723	827.739	829.754	831.77	847.708	849.723	851.739	853.754	855.77	857.786	859.801	875.739	877.754	879.77	881.786	883.801	885.817	887.833
42-C13+H	792.648	794.664	796.68	798.695	800.711	802.727	804.742	820.68	822.695	824.711	826.727	828.742	830.758	832.773	848.711	850.727	852.742	854.758	856.773	858.789	860.805	876.742	878.758	880.773	882.789	884.805	886.82	888.836
43-C13+H								821.683	823.699	825.714	827.73	829.746	831.761	833.777	849.714	851.73	853.746	855.761	857.777	859.792	861.808	877.746	879.761	881.777	883.792	885.808	887.824	889.839
44-C13+H								822.686	824.702	826.718	828.733	830.749	832.765	834.78	850.718	852.733	854.749	856.765	858.78	860.796	862.812	878.749	880.765	882.78	884.796	886.812	888.827	890.843
45-C13+H															851.721	853.737	855.752	857.768	859.784	861.799	863.815	879.752	881.768	883.784	885.799	887.815	889.831	891.846
46-C13+H															852.724	854.74	856.756	858.771	860.787	862.803	864.818	880.756	882.771	884.787	886.803	888.818	890.834	892.85
																						880.756	882.771	884.787	886.803	888.818	890.834	892.85
																						881.759	883.775	885.79	887.806	889.822	891.837	893.853

## Sheet: PC_bulk_collection
PC-34	PC-36	PC-38	PC-40
750.507	778.539	806.57	834.601
751.511	779.542	807.573	835.605
752.514	780.545	808.577	836.608
753.517	781.549	809.58	837.611
754.521	782.552	810.583	838.615
755.524	783.555	811.587	839.618
756.528	784.559	812.59	840.621
757.531	785.562	813.593	841.625
758.534	786.566	814.597	842.628
759.538	787.569	815.6	843.631
760.541	788.572	816.604	844.635
761.544	789.576	817.607	845.638
762.548	790.579	818.61	846.642
763.551	791.582	819.614	847.645
764.554	792.586	820.617	848.648
765.558	793.589	821.62	849.652
766.561	794.592	822.624	850.655
767.564	795.596	823.627	851.658
768.568	796.599	824.63	852.662
769.571	797.602	825.634	853.665
770.574	798.606	826.637	854.668
771.578	799.609	827.64	855.672
772.581	800.612	828.644	856.675
773.585	801.616	829.647	857.678
774.588	802.619	830.651	858.682
775.591	803.623	831.654	859.685
776.595	804.626	832.657	860.689
777.598	805.629	833.661	861.692
778.601	806.633	834.664	862.695
779.605	807.636	835.667	863.699
780.608	808.639	836.671	864.702
781.611	809.643	837.674	865.705
782.615	810.646	838.677	866.709
783.618	811.649	839.681	867.712
784.621	812.653	840.684	868.715
785.625	813.656	841.687	869.719
786.628	814.659	842.691	870.722
787.632	815.663	843.694	871.725
788.635	816.666	844.697	872.729
789.638	817.67	845.701	873.732
790.642	818.673	846.704	874.735
791.645	819.676	847.708	875.739
792.648	820.68	848.711	876.742
752.523	821.683	849.714	877.746
753.526	822.686	850.718	878.749
754.53	780.554	851.721	879.752
755.533	781.558	852.724	880.756
756.536	782.561	808.586	880.756
757.54	783.564	809.589	881.759
758.543	784.568	810.592	836.617
759.547	785.571	811.596	837.62
760.55	786.574	812.599	838.624
761.553	787.578	813.602	839.627
762.557	788.581	814.606	840.63
763.56	789.585	815.609	841.634
764.563	790.588	816.612	842.637
765.567	791.591	817.616	843.64
766.57	792.595	818.619	844.644
767.573	793.598	819.623	845.647
768.577	794.601	820.626	846.65
769.58	795.605	821.629	847.654
770.583	796.608	822.633	848.657
771.587	797.611	823.636	849.661
772.59	798.615	824.639	850.664
773.593	799.618	825.643	851.667
774.597	800.621	826.646	852.671
775.6	801.625	827.649	853.674
776.604	802.628	828.653	854.677
777.607	803.631	829.656	855.681
778.61	804.635	830.659	856.684
779.614	805.638	831.663	857.687
780.617	806.642	832.666	858.691
781.62	807.645	833.67	859.694
782.624	808.648	834.673	860.697
783.627	809.652	835.676	861.701
784.63	810.655	836.68	862.704
785.634	811.658	837.683	863.708
786.637	812.662	838.686	864.711
787.64	813.665	839.69	865.714
788.644	814.668	840.693	866.718
789.647	815.672	841.696	867.721
790.651	816.675	842.7	868.724
791.654	817.678	843.703	869.728
792.657	818.682	844.706	870.731
793.661	819.685	845.71	871.734
794.664	820.689	846.713	872.738
754.539	821.692	847.716	873.741
755.542	822.695	848.72	874.744
756.545	823.699	849.723	875.748
757.549	824.702	850.727	876.751
758.552	782.57	851.73	877.754
759.555	783.573	852.733	878.758
760.559	784.577	853.737	879.761
761.562	785.58	854.74	880.765
762.566	786.583	810.601	881.768
763.569	787.587	811.605	882.771
764.572	788.59	812.608	882.771
765.576	789.593	813.611	883.775
766.579	790.597	814.615	838.633
767.582	791.6	815.618	839.636
768.586	792.604	816.621	840.639
769.589	793.607	817.625	841.643
770.592	794.61	818.628	842.646
771.596	795.614	819.631	843.649
772.599	796.617	820.635	844.653
773.602	797.62	821.638	845.656
774.606	798.624	822.642	846.659
775.609	799.627	823.645	847.663
776.612	800.63	824.648	848.666
777.616	801.634	825.652	849.669
778.619	802.637	826.655	850.673
779.623	803.64	827.658	851.676
780.626	804.644	828.662	852.68
781.629	805.647	829.665	853.683
782.633	806.651	830.668	854.686
783.636	807.654	831.672	855.69
784.639	808.657	832.675	856.693
785.643	809.661	833.678	857.696
786.646	810.664	834.682	858.7
787.649	811.667	835.685	859.703
788.653	812.671	836.689	860.706
789.656	813.674	837.692	861.71
790.659	814.677	838.695	862.713
791.663	815.681	839.699	863.716
792.666	816.684	840.702	864.72
793.67	817.687	841.705	865.723
794.673	818.691	842.709	866.727
795.676	819.694	843.712	867.73
796.68	820.697	844.715	868.733
756.554	821.701	845.719	869.737
757.558	822.704	846.722	870.74
758.561	823.708	847.725	871.743
759.564	824.711	848.729	872.747
760.568	825.714	849.732	873.75
761.571	826.718	850.735	874.753
762.574	784.586	851.739	875.757
763.578	785.589	852.742	876.76
764.581	786.592	853.746	877.763
765.585	787.596	854.749	878.767
766.588	788.599	855.752	879.77
767.591	789.602	856.756	880.773
768.595	790.606	812.617	881.777
769.598	791.609	813.62	882.78
770.601	792.612	814.624	883.784
771.605	793.616	815.627	884.787
772.608	794.619	816.63	884.787
773.611	795.623	817.634	885.79
774.615	796.626	818.637	840.648
775.618	797.629	819.64	841.652
776.621	798.633	820.644	842.655
777.625	799.636	821.647	843.658
778.628	800.639	822.65	844.662
779.631	801.643	823.654	845.665
780.635	802.646	824.657	846.668
781.638	803.649	825.661	847.672
782.642	804.653	826.664	848.675
783.645	805.656	827.667	849.678
784.648	806.659	828.671	850.682
785.652	807.663	829.674	851.685
786.655	808.666	830.677	852.688
787.658	809.67	831.681	853.692
788.662	810.673	832.684	854.695
789.665	811.676	833.687	855.699
790.668	812.68	834.691	856.702
791.672	813.683	835.694	857.705
792.675	814.686	836.697	858.709
793.678	815.69	837.701	859.712
794.682	816.693	838.704	860.715
795.685	817.696	839.708	861.719
796.689	818.7	840.711	862.722
797.692	819.703	841.714	863.725
798.695	820.706	842.718	864.729
758.57	821.71	843.721	865.732
759.573	822.713	844.724	866.735
760.577	823.716	845.728	867.739
761.58	824.72	846.731	868.742
762.583	825.723	847.734	869.746
763.587	826.727	848.738	870.749
764.59	827.73	849.741	871.752
765.593	828.733	850.744	872.756
766.597	786.601	851.748	873.759
767.6	787.605	852.751	874.762
768.604	788.608	853.754	875.766
769.607	789.611	854.758	876.769
770.61	790.615	855.761	877.772
771.614	791.618	856.765	878.776
772.617	792.621	857.768	879.779
773.62	793.625	858.771	880.782
774.624	794.628	814.633	881.786
775.627	795.631	815.636	882.789
776.63	796.635	816.639	883.792
777.634	797.638	817.643	884.796
778.637	798.642	818.646	885.799
779.64	799.645	819.649	886.803
780.644	800.648	820.653	886.803
781.647	801.652	821.656	887.806
782.651	802.655	822.659	842.664
783.654	803.658	823.663	843.667
784.657	804.662	824.666	844.671
785.661	805.665	825.669	845.674
786.664	806.668	826.673	846.677
787.667	807.672	827.676	847.681
788.671	808.675	828.68	848.684
789.674	809.678	829.683	849.687
790.677	810.682	830.686	850.691
791.681	811.685	831.69	851.694
792.684	812.689	832.693	852.697
793.687	813.692	833.696	853.701
794.691	814.695	834.7	854.704
795.694	815.699	835.703	855.707
796.697	816.702	836.706	856.711
797.701	817.705	837.71	857.714
798.704	818.709	838.713	858.718
799.708	819.712	839.716	859.721
800.711	820.715	840.72	860.724
760.586	821.719	841.723	861.728
761.589	822.722	842.727	862.731
762.592	823.725	843.73	863.734
763.596	824.729	844.733	864.738
764.599	825.732	845.737	865.741
765.602	826.735	846.74	866.744
766.606	827.739	847.743	867.748
767.609	828.742	848.747	868.751
768.612	829.746	849.75	869.754
769.616	830.749	850.753	870.758
770.619	788.617	851.757	871.761
771.623	789.62	852.76	872.765
772.626	790.624	853.763	873.768
773.629	791.627	854.767	874.771
774.633	792.63	855.77	875.775
775.636	793.634	856.773	876.778
776.639	794.637	857.777	877.781
777.643	795.64	858.78	878.785
778.646	796.644	859.784	879.788
779.649	797.647	860.787	880.791
780.653	798.65	816.648	881.795
781.656	799.654	817.652	882.798
782.659	800.657	818.655	883.801
783.663	801.661	819.658	884.805
784.666	802.664	820.662	885.808
785.67	803.667	821.665	886.812
786.673	804.671	822.668	887.815
787.676	805.674	823.672	888.818
788.68	806.677	824.675	888.818
789.683	807.681	825.678	889.822
790.686	808.684	826.682	844.68
791.69	809.687	827.685	845.683
792.693	810.691	828.688	846.686
793.696	811.694	829.692	847.69
794.7	812.697	830.695	848.693
795.703	813.701	831.699	849.696
796.706	814.704	832.702	850.7
797.71	815.708	833.705	851.703
798.713	816.711	834.709	852.706
799.716	817.714	835.712	853.71
800.72	818.718	836.715	854.713
801.723	819.721	837.719	855.716
802.727	820.724	838.722	856.72
762.601	821.728	839.725	857.723
763.605	822.731	840.729	858.727
764.608	823.734	841.732	859.73
765.611	824.738	842.735	860.733
766.615	825.741	843.739	861.737
767.618	826.744	844.742	862.74
768.621	827.748	845.746	863.743
769.625	828.751	846.749	864.747
770.628	829.754	847.752	865.75
771.631	830.758	848.756	866.753
772.635	831.761	849.759	867.757
773.638	832.765	850.762	868.76
774.642	790.633	851.766	869.763
775.645	791.636	852.769	870.767
776.648	792.639	853.772	871.77
777.652	793.643	854.776	872.773
778.655	794.646	855.779	873.777
779.658	795.649	856.782	874.78
780.662	796.653	857.786	875.784
781.665	797.656	858.789	876.787
782.668	798.659	859.792	877.79
783.672	799.663	860.796	878.794
784.675	800.666	861.799	879.797
785.678	801.669	862.803	880.8
786.682	802.673	818.664	881.804
787.685	803.676	819.667	882.807
788.689	804.68	820.671	883.81
789.692	805.683	821.674	884.814
790.695	806.686	822.677	885.817
791.699	807.69	823.681	886.82
792.702	808.693	824.684	887.824
793.705	809.696	825.687	888.827
794.709	810.7	826.691	889.831
795.712	811.703	827.694	890.834
796.715	812.706	828.697	890.834
797.719	813.71	829.701	891.837
798.722	814.713	830.704	846.695
799.725	815.716	831.707	847.699
800.729	816.72	832.711	848.702
801.732	817.723	833.714	849.705
802.735	818.727	834.718	850.709
803.739	819.73	835.721	851.712
804.742	820.733	836.724	852.715
	821.737	837.728	853.719
	822.74	838.731	854.722
	823.743	839.734	855.725
	824.747	840.738	856.729
	825.75	841.741	857.732
	826.753	842.744	858.735
	827.757	843.748	859.739
	828.76	844.751	860.742
	829.763	845.754	861.746
	830.767	846.758	862.749
	831.77	847.761	863.752
	832.773	848.765	864.756
	833.777	849.768	865.759
	834.78	850.771	866.762
		851.775	867.766
		852.778	868.769
		853.781	869.772
		854.785	870.776
		855.788	871.779
		856.791	872.782
		857.795	873.786
		858.798	874.789
		859.801	875.792
		860.805	876.796
		861.808	877.799
		862.812	878.803
		863.815	879.806
		864.818	880.809
			881.813
			882.816
			883.819
			884.823
			885.826
			886.829
			887.833
			888.836
			889.839
			890.843
			891.846
			892.85
			892.85
			893.853
